# Supplementary material for: Exciplex and excimer molecular probes: detection of conformational flip in a myo-inositol chair
Source: Royal Society of Chemistry journal article supplement (doi:10.1039/b800710a), 2008-01-01
Supplement: b800710a.pdf [file b800710a.pdf]

## ***Supplementary Information***

### **Exciplex and excimer molecular probes: detection of conformational flip in a myo-inositol chair**

**Manikandan Kadirvel, Biljana Arsic, Sally Freeman\* and Elena. V. Bichenkova\***

*\*School of Pharmacy and Pharmaceutical Sciences, The University of Manchester, Oxford Road, Manchester, M13 9PT, UK*

*E-mail: [sally.freeman@manchester.ac.uk](mailto:sally.freeman@manchester.ac.uk)  
[Elena.V.Bichenkova@manchester.ac.uk](mailto:Elena.V.Bichenkova@manchester.ac.uk)*

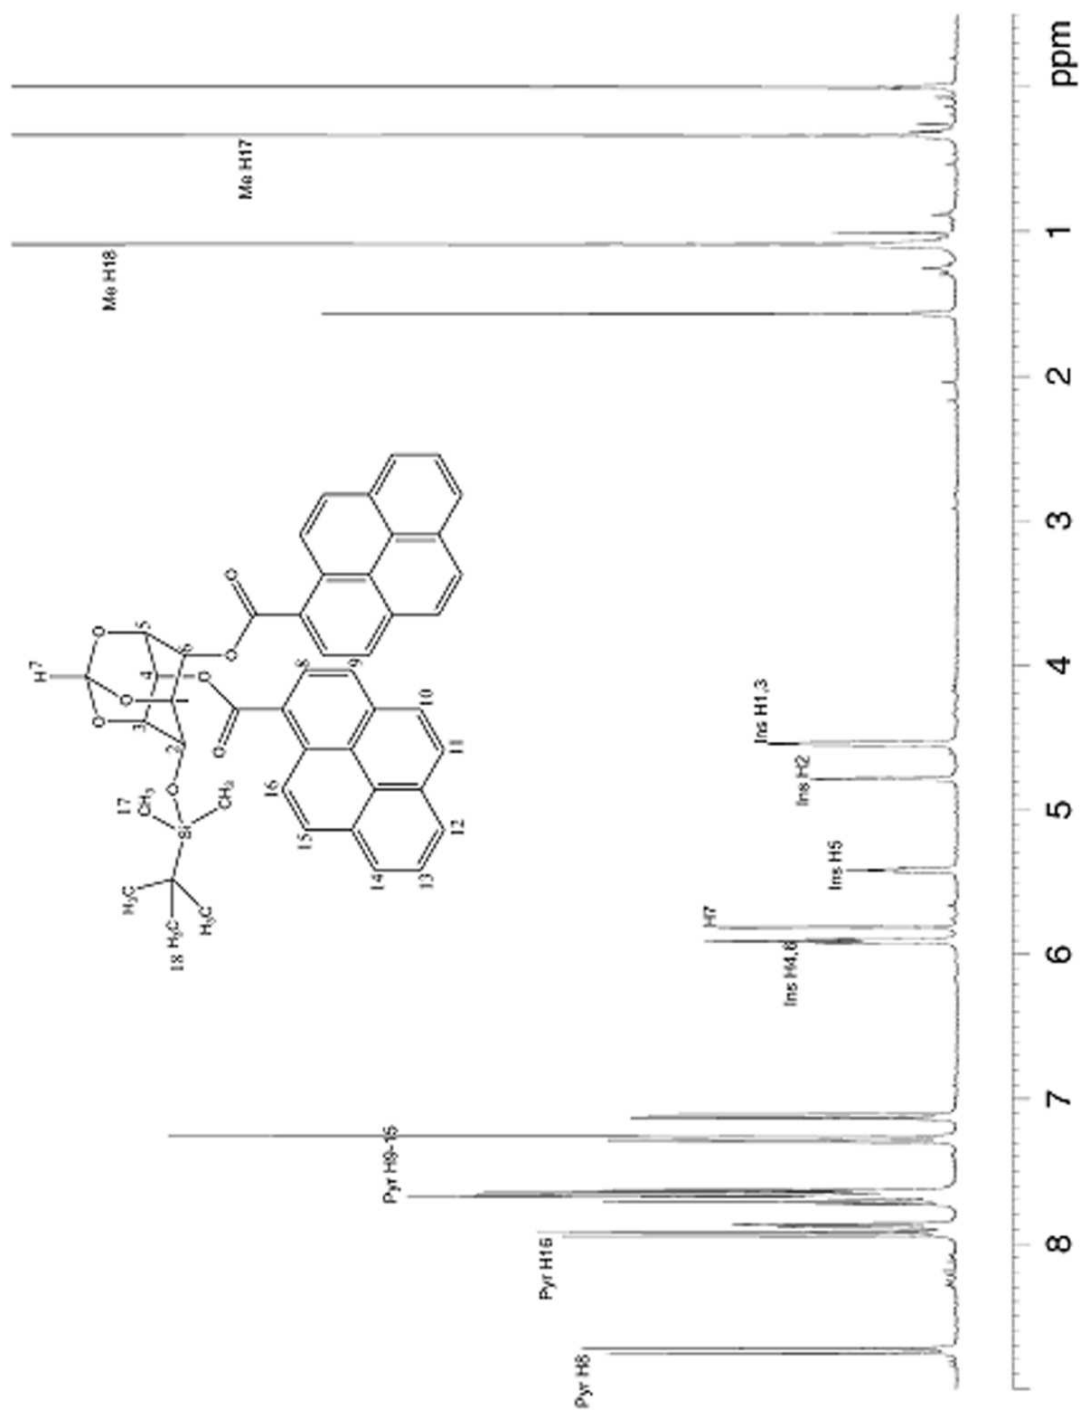

**Figure SI 1:** <sup>1</sup>H NMR spectrum of 2-O-*tert*-butyldimethylsilyl-4,6-bis-O-pyrenoyl-*myo*-inositol-1,3,5-orthoformate (**6**) in CDCl<sub>3</sub>

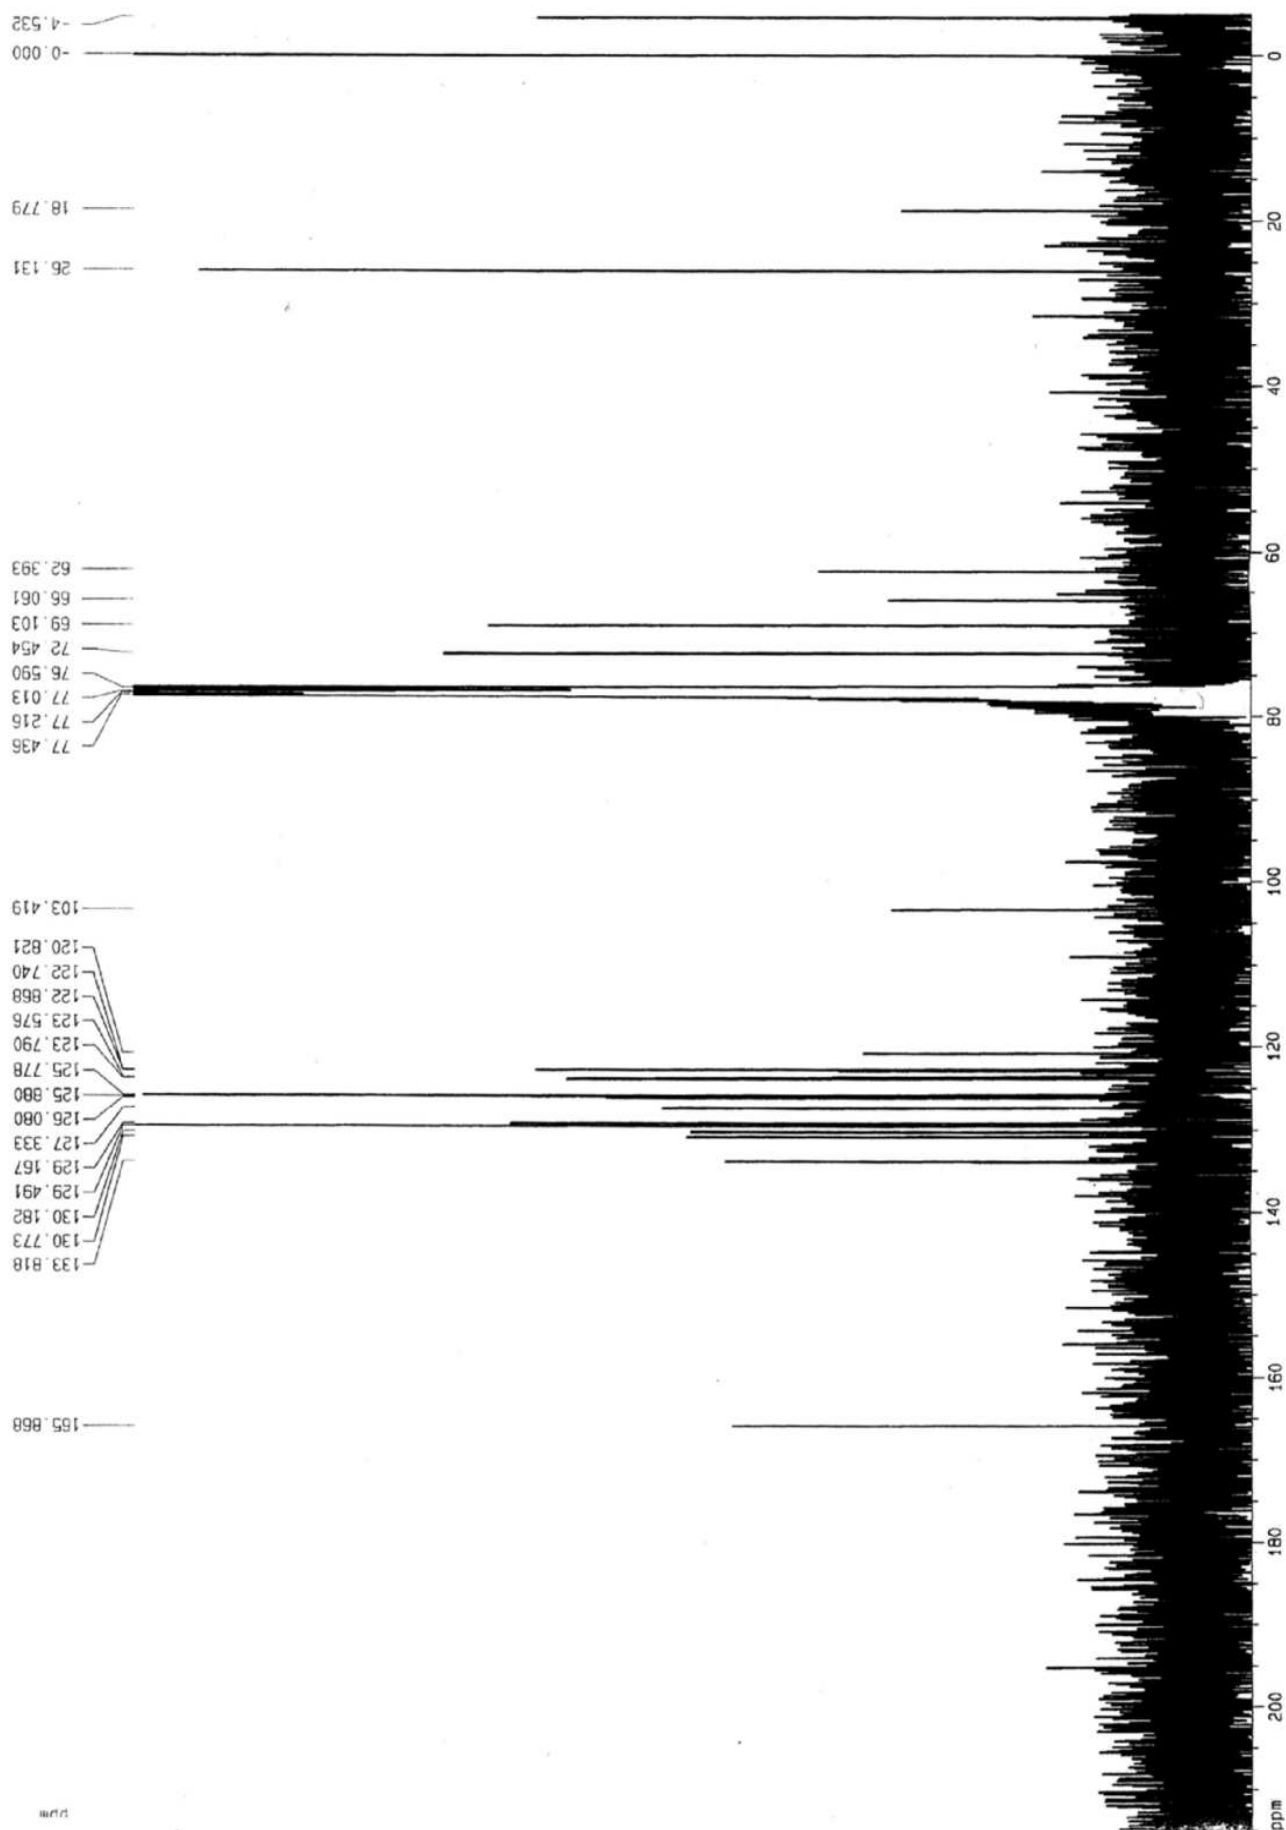

**Figure SI 2:**  $^{13}\text{C}$  NMR spectrum of 2-O-*tert*-butyldimethylsilyl-4,6-bis-O-pyrenoyl-*myo*-inositol-1,3,5-orthoformate (**6**) in  $\text{CDCl}_3$

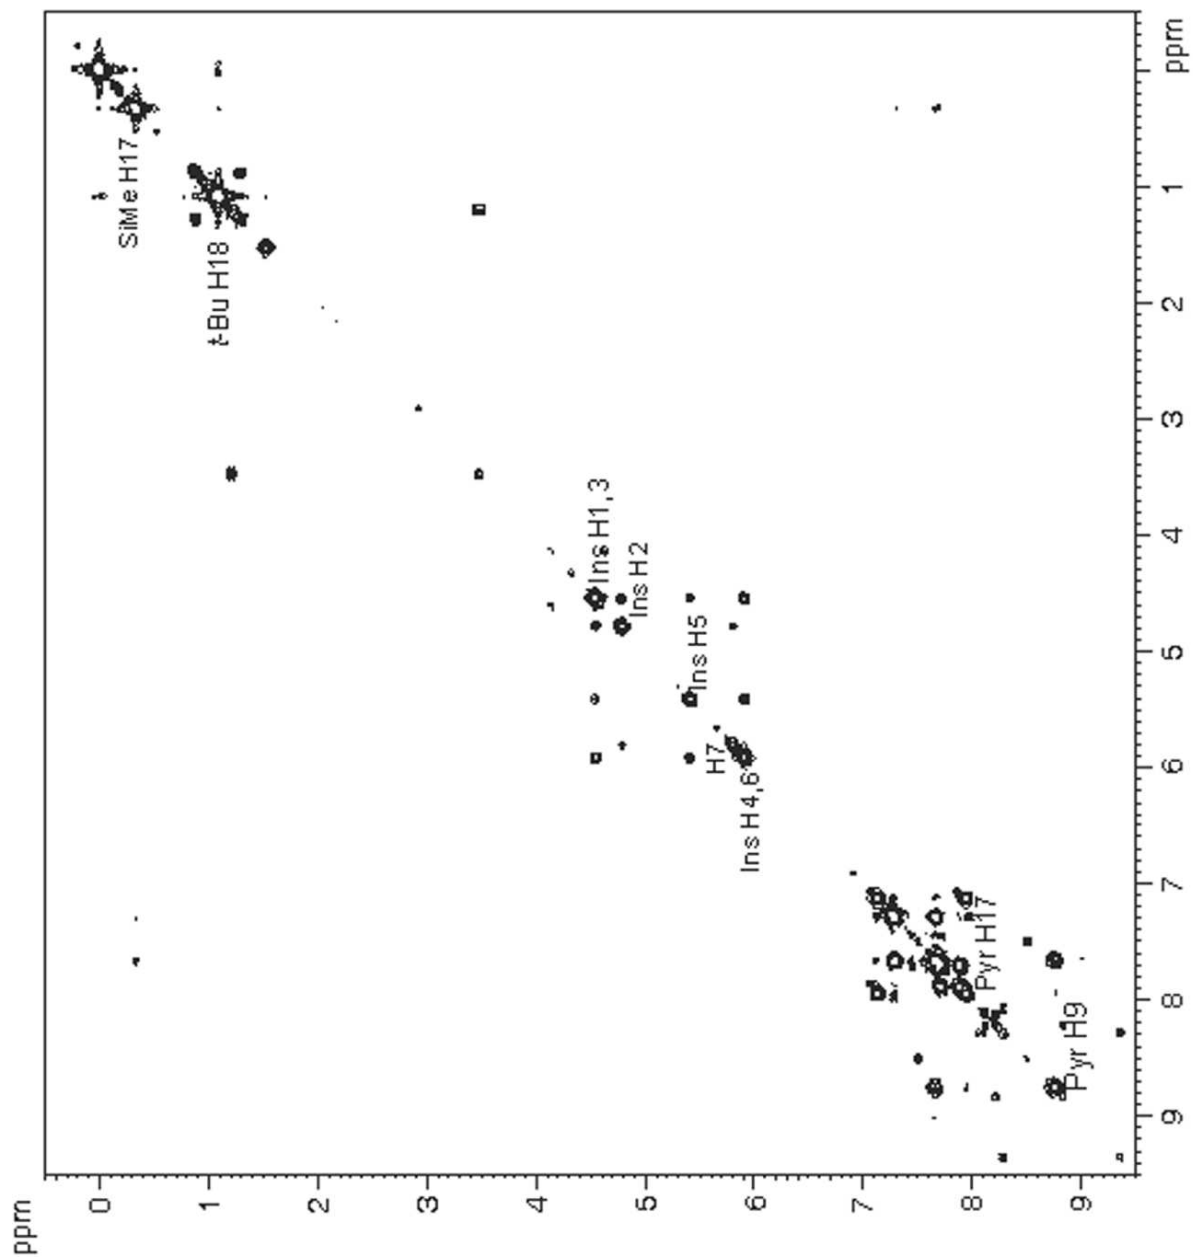

**Figure SI 3:** <sup>1</sup>H COSY spectrum of 2-O-*tert*-butyldimethylsilyl-4,6-bis-O-pyrenoyl-*myo*-inositol-1,3,5-orthoformate (**6**) in CDCl<sub>3</sub>

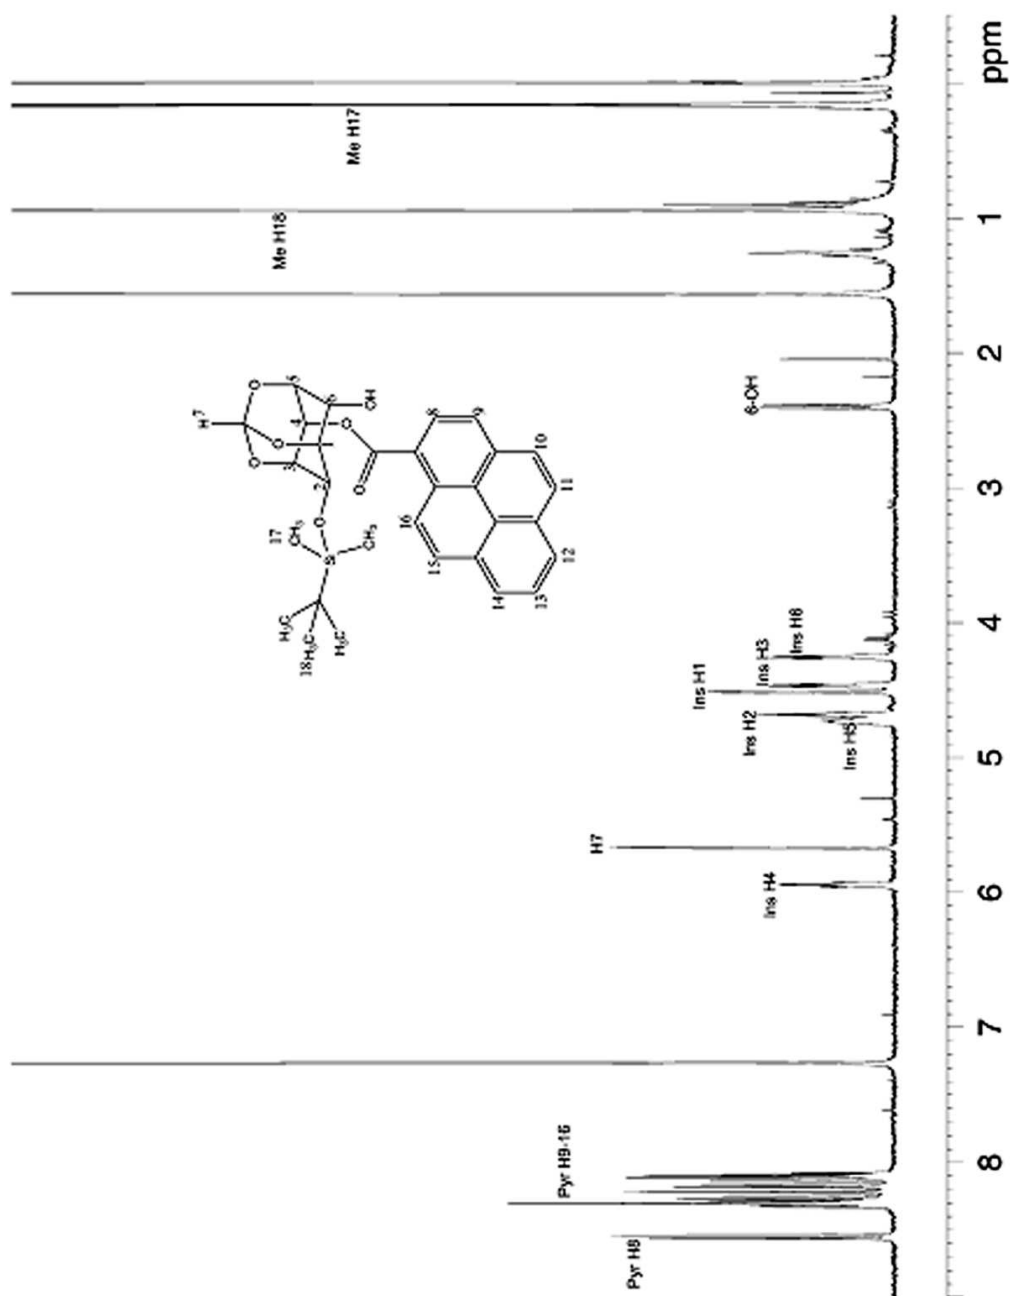

**Figure SI 4:**  $^1\text{H}$  spectrum of 2-O-*tert*-butyl(dimethylsilyl)-4-O-pyrenyl-1,3,5-orthoformate (7) in  $\text{CDCl}_3$

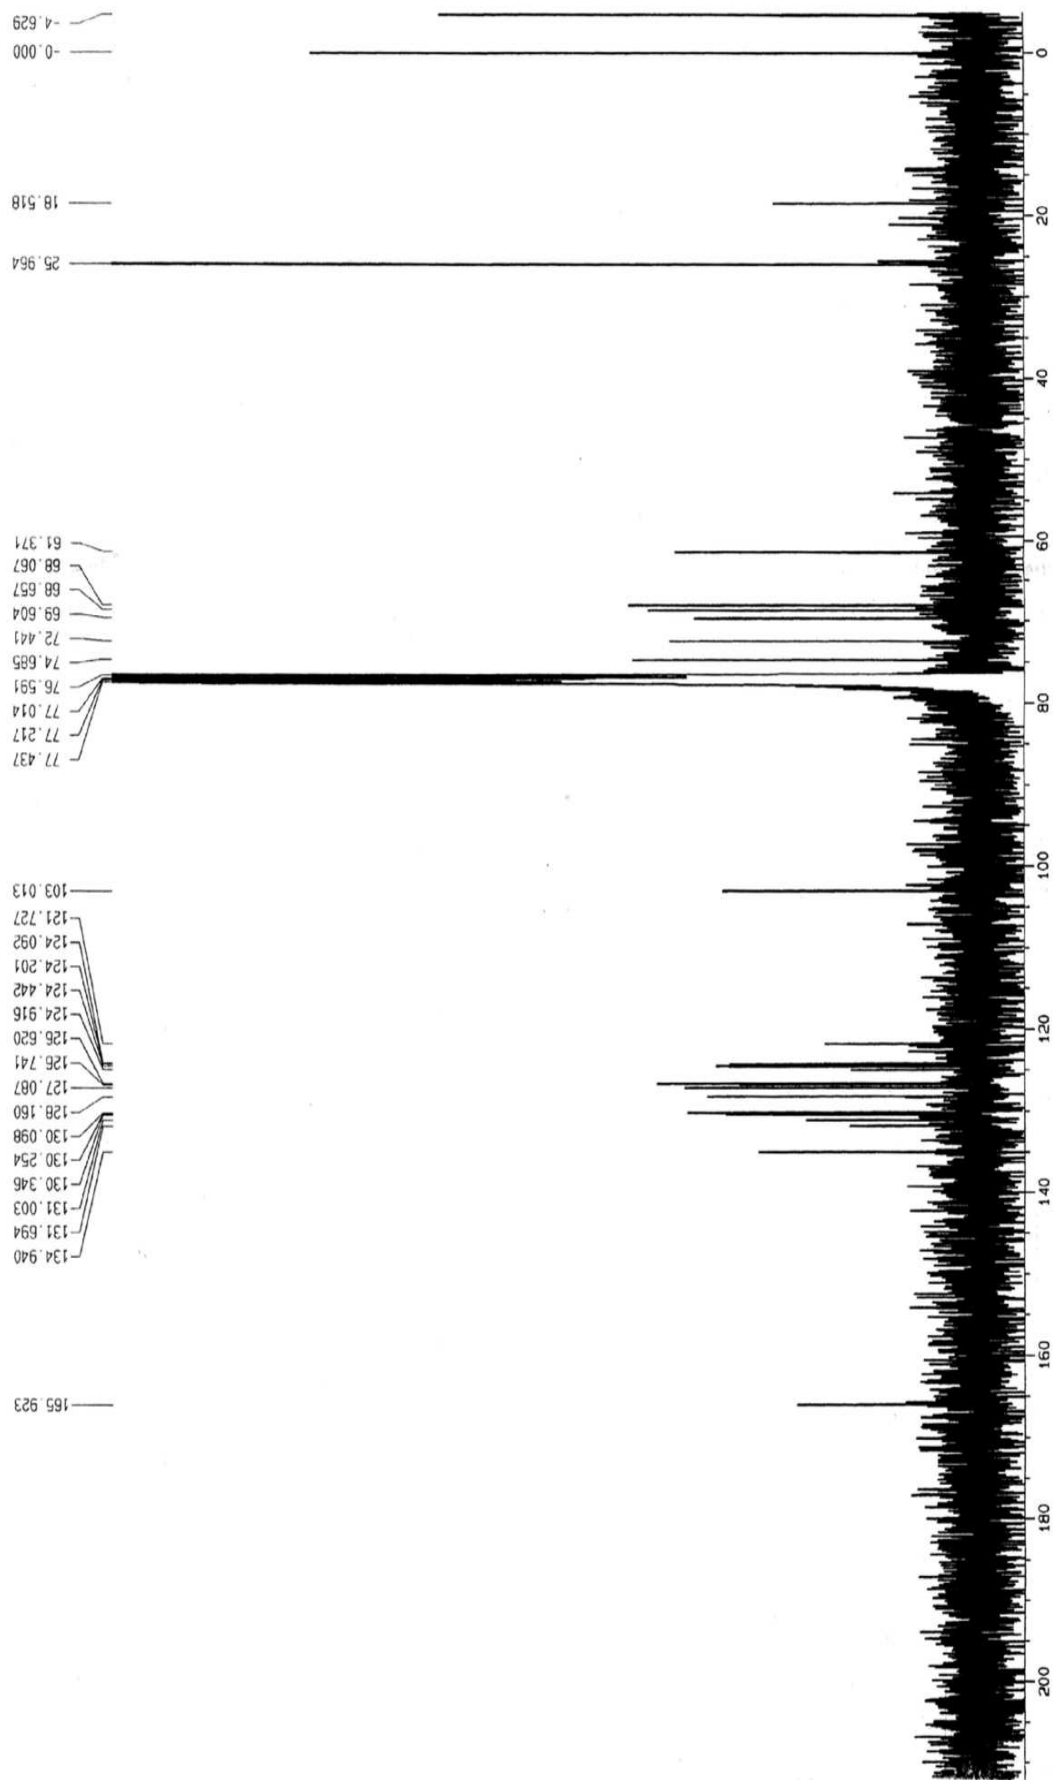

**Figure SI 5:**  $^{13}\text{C}$  NMR spectrum of 2-O-*tert*-butylidimethylsilyl-4-O-pyrenoyl-myco-inositol-1,3,5-orthoformate (7) in  $\text{CDCl}_3$

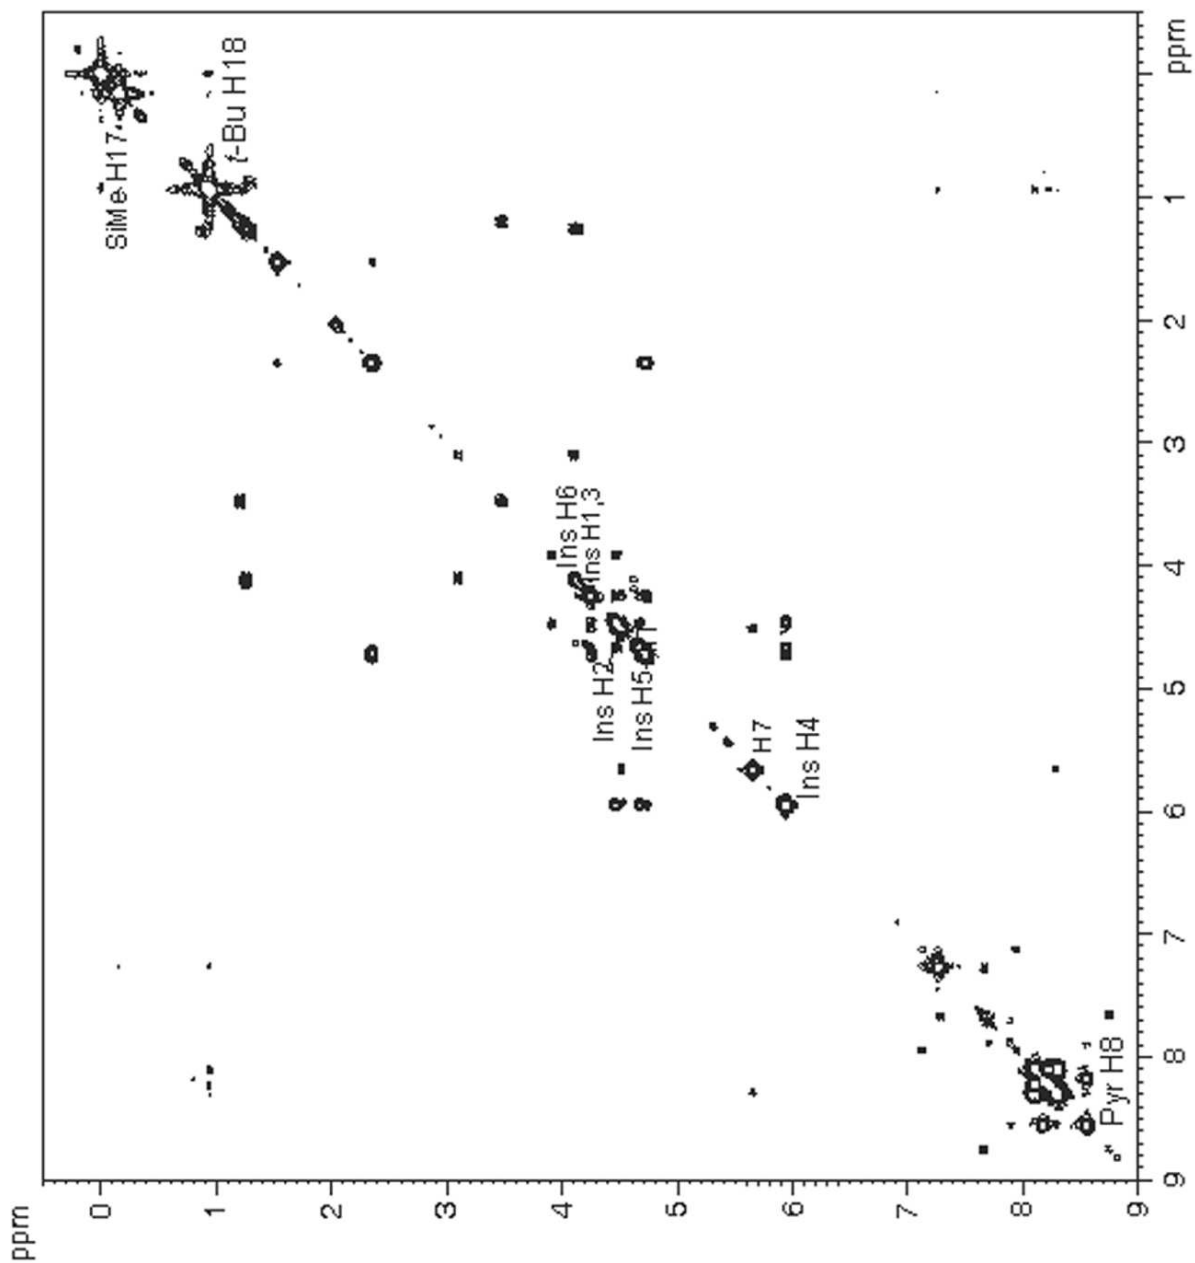

**Figure SI 6:**  $^1\text{H}$  COSY spectrum of 2-O-*tert*-butyldimethylsilyl-4-O-pyrenyl-*myo*-inositol-1,3,5-orthoformate (**7**) in  $\text{CDCl}_3$

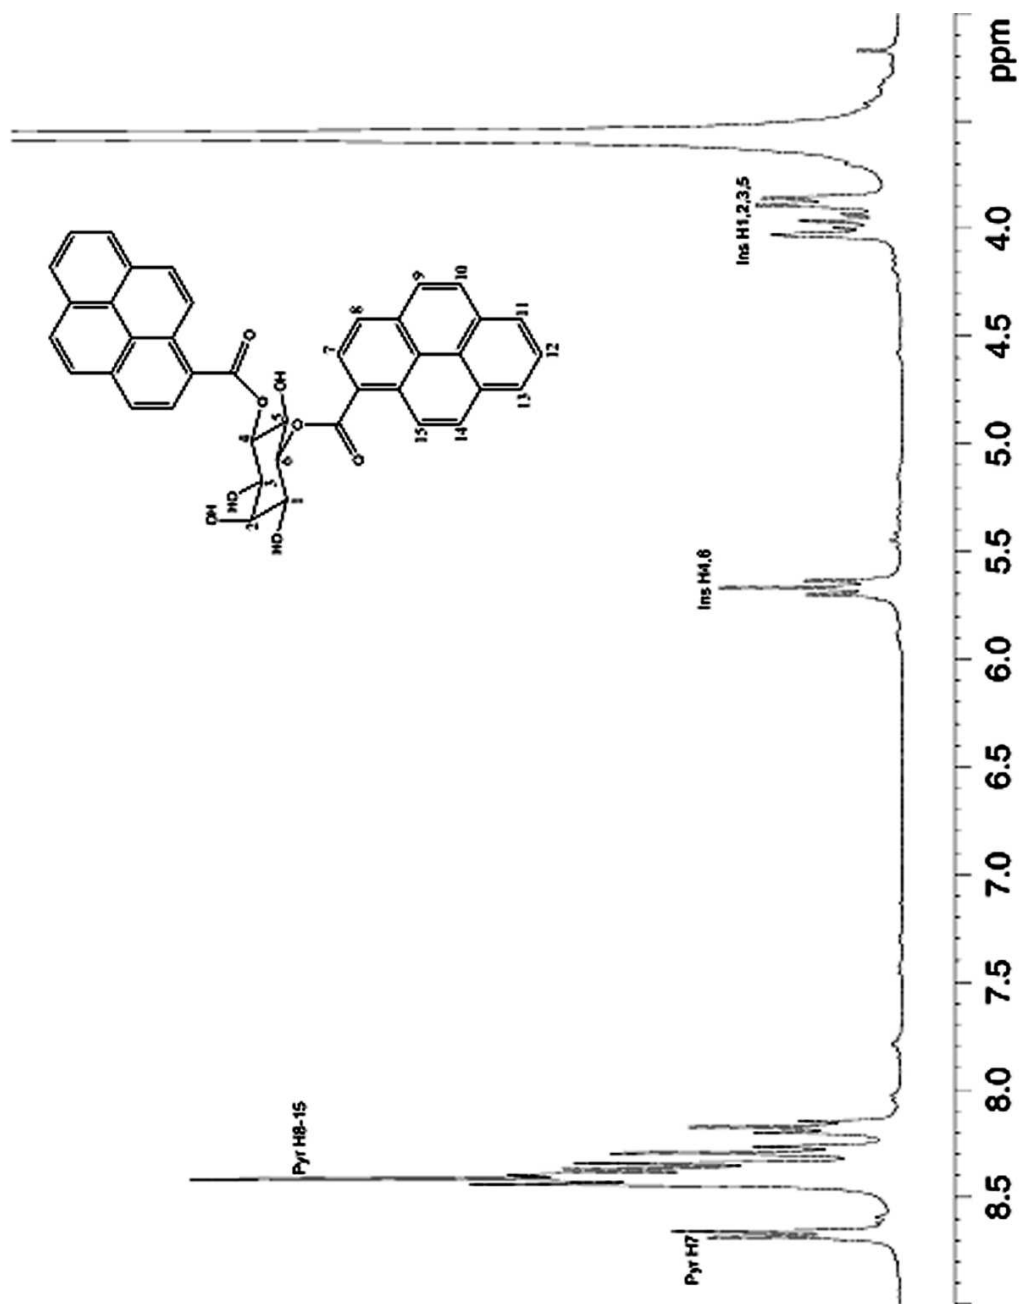

Figure SI 7: <sup>1</sup>H NMR spectrum of 4,6-bis-O-pyrenoyl-myoinositol (8) in DMSO-d<sub>6</sub>/D<sub>2</sub>O



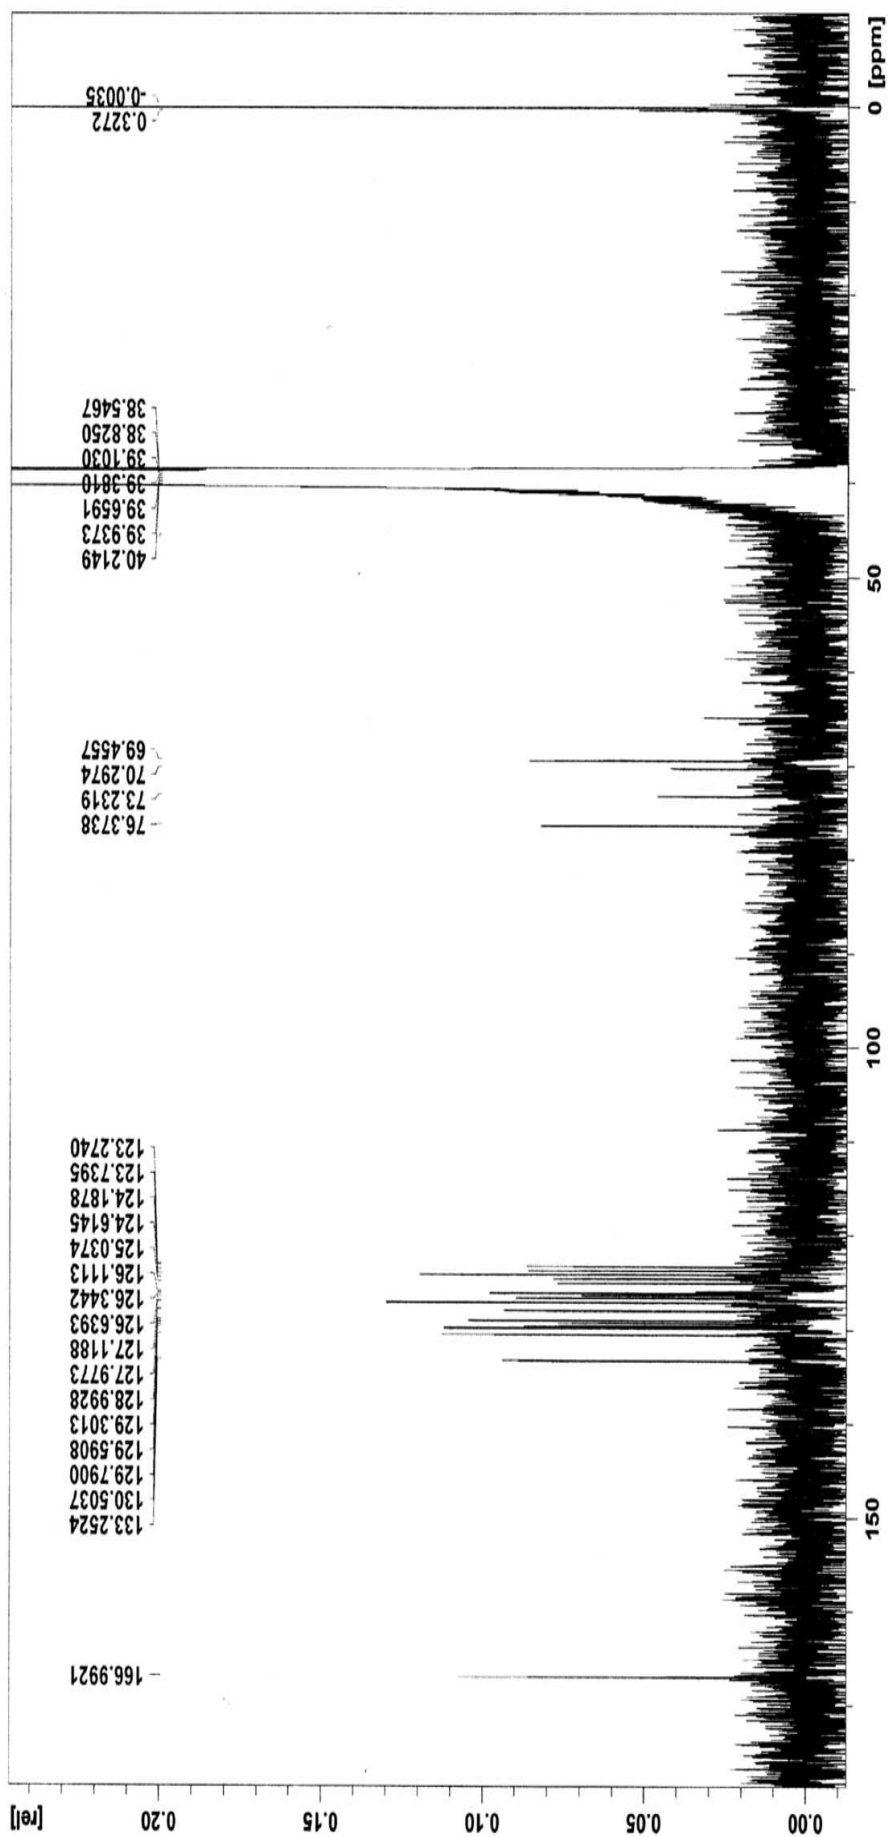

Figure SI 8:  $^{13}\text{C}$  NMR spectrum of 4,6-bis-O-pyrenoyl-myoinositol (8) in DMSO- $d_9$ /D $_2$ O

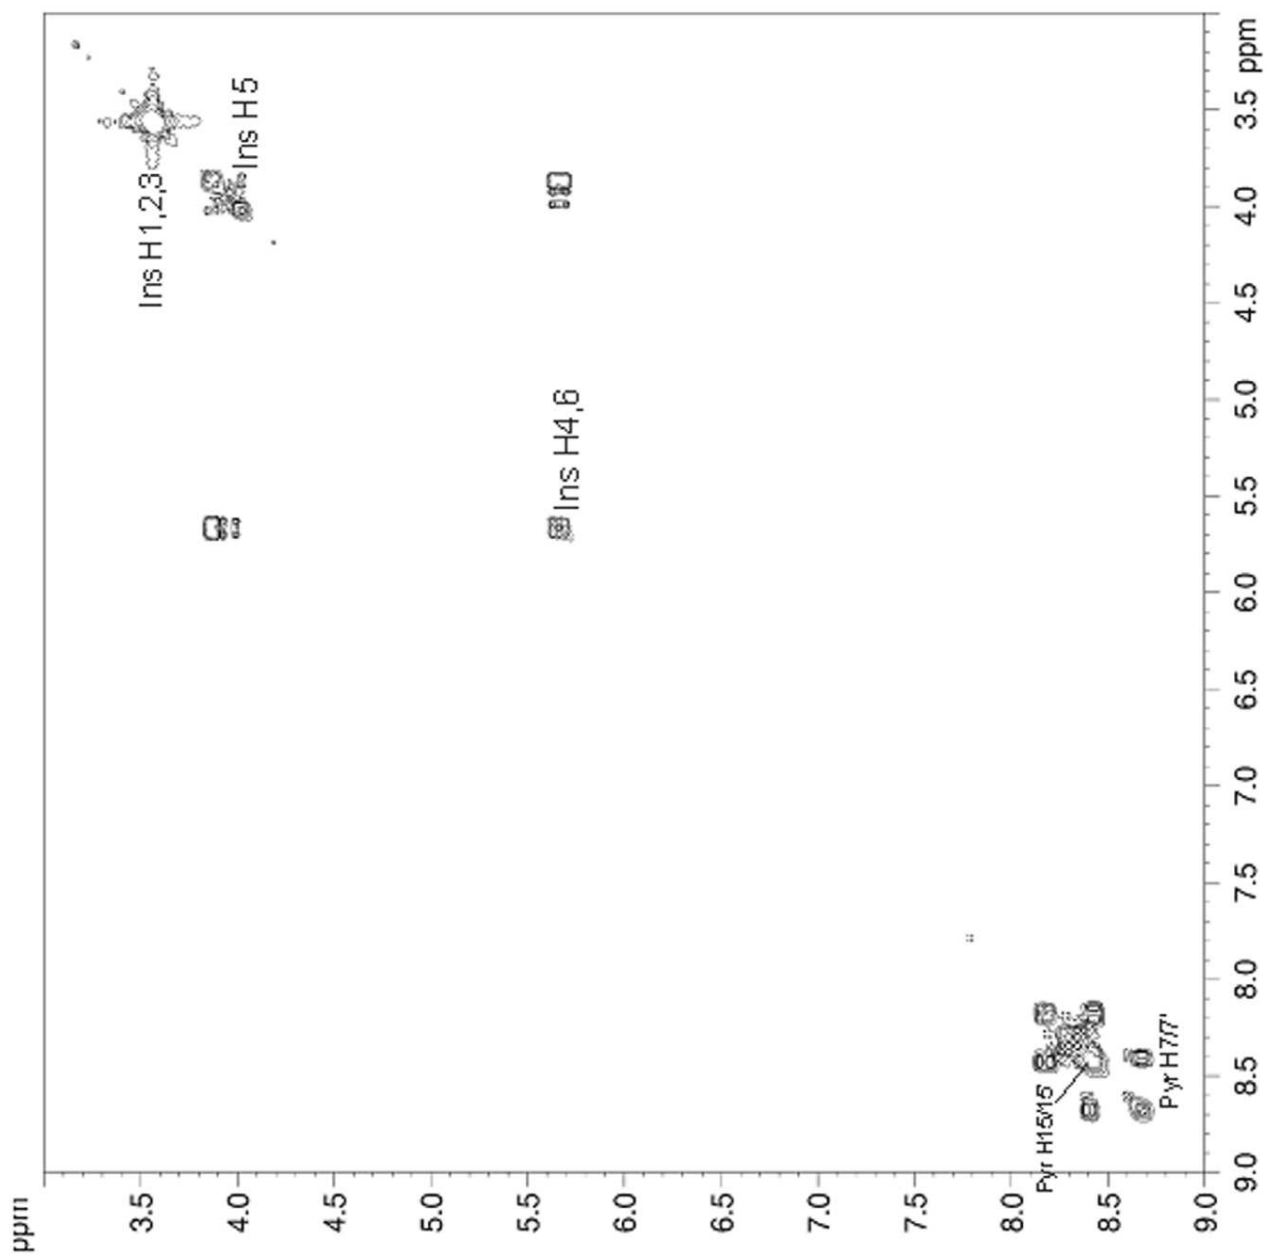

**Figure SI 9:**  $^1\text{H}$  COSY spectrum of 4,6-bis-O-pyrenyl-myoinositol (**8**) in  $\text{DMSO-d}_6/\text{D}_2\text{O}$

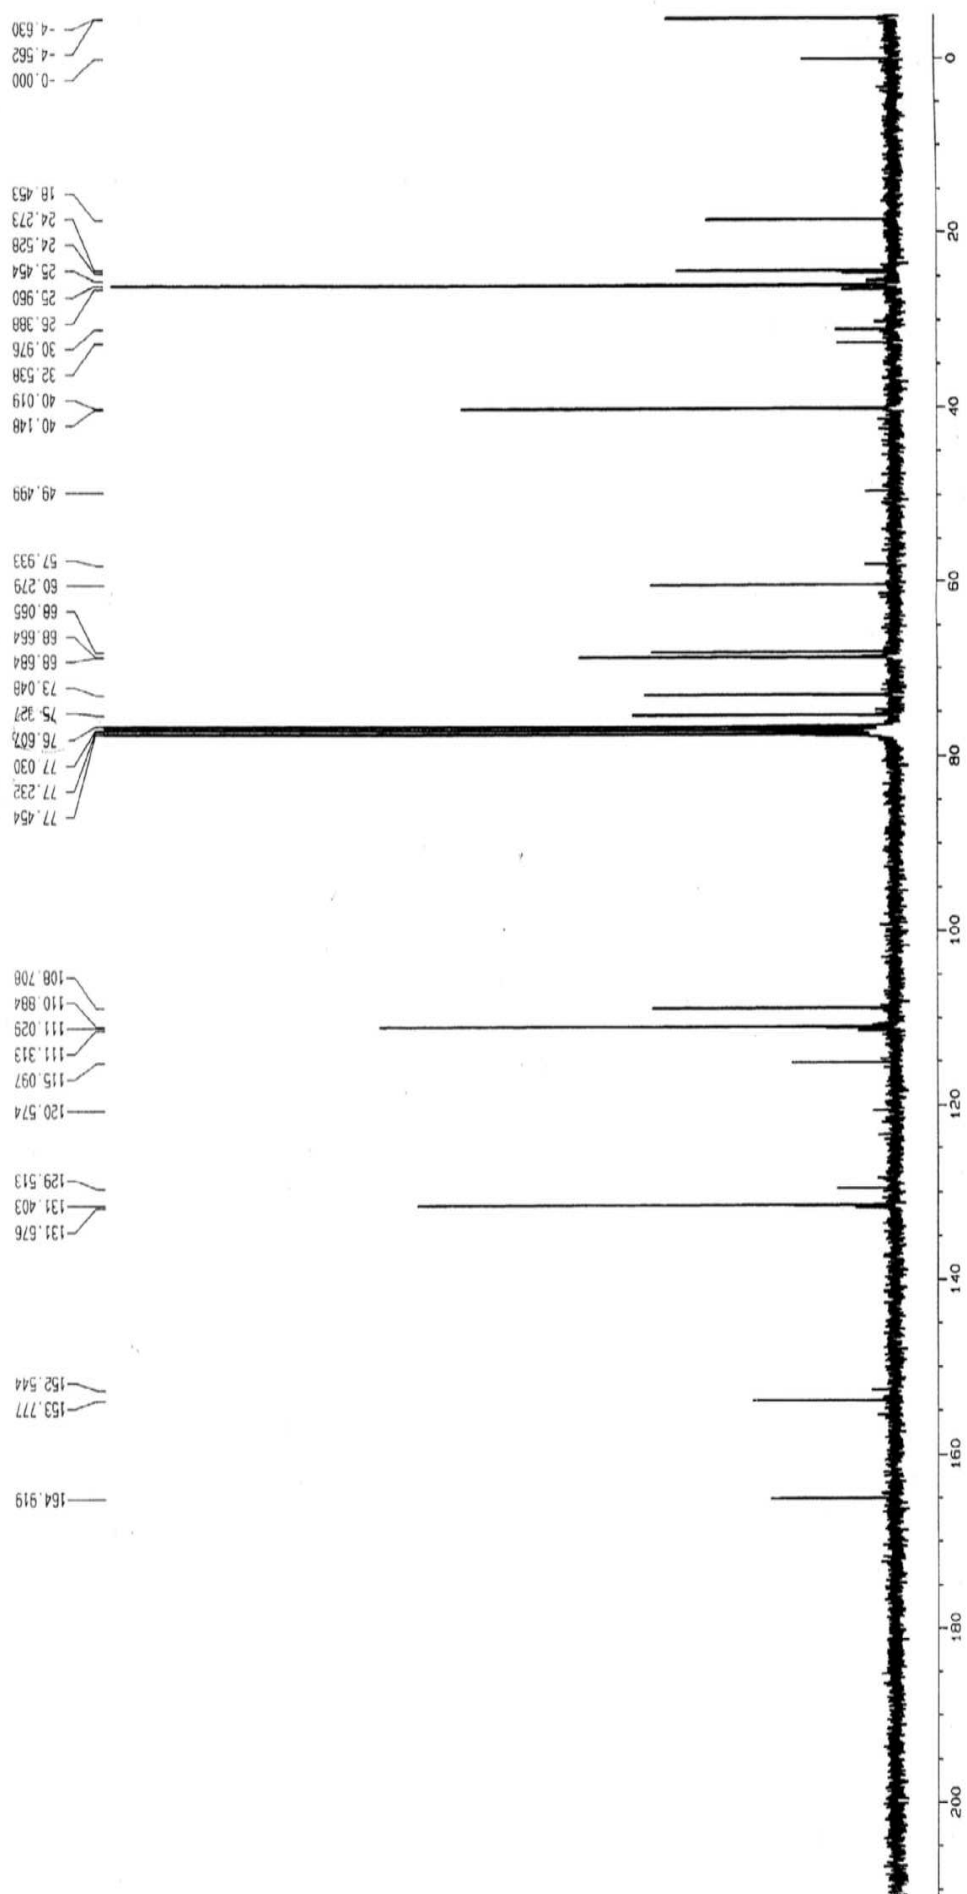

**Figure SI 11:**  $^{13}\text{C}$  NMR spectrum of 2-O-*tert*-butyldimethylsilyl-4-O-[4-(dimethylamino)benzoyl]-*myo*-inositol-1,3,5-orthoacetate (**9**) in  $\text{CDCl}_3$

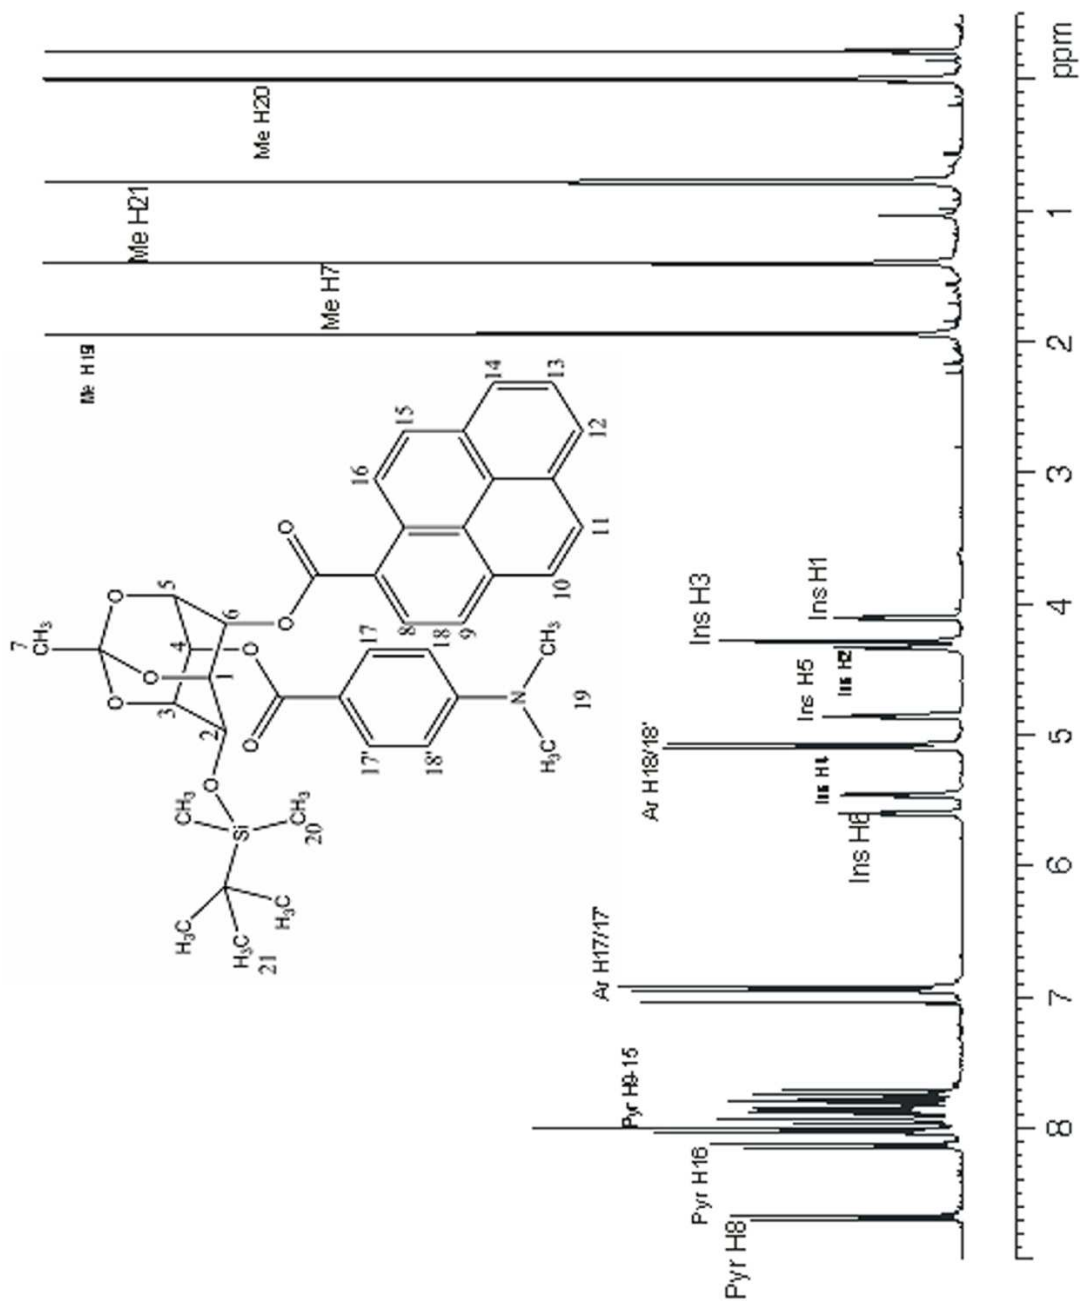

**Figure SI 12:** <sup>1</sup>H NMR spectrum of 2-O-*tert*-butyl(dimethylsilyl)-4-O-[4-(dimethylamino)benzoyl]-6-O-pyrenoyl-*myo*-inositol-1,3,5-orthoacetate (**10**) in CDCl<sub>3</sub>

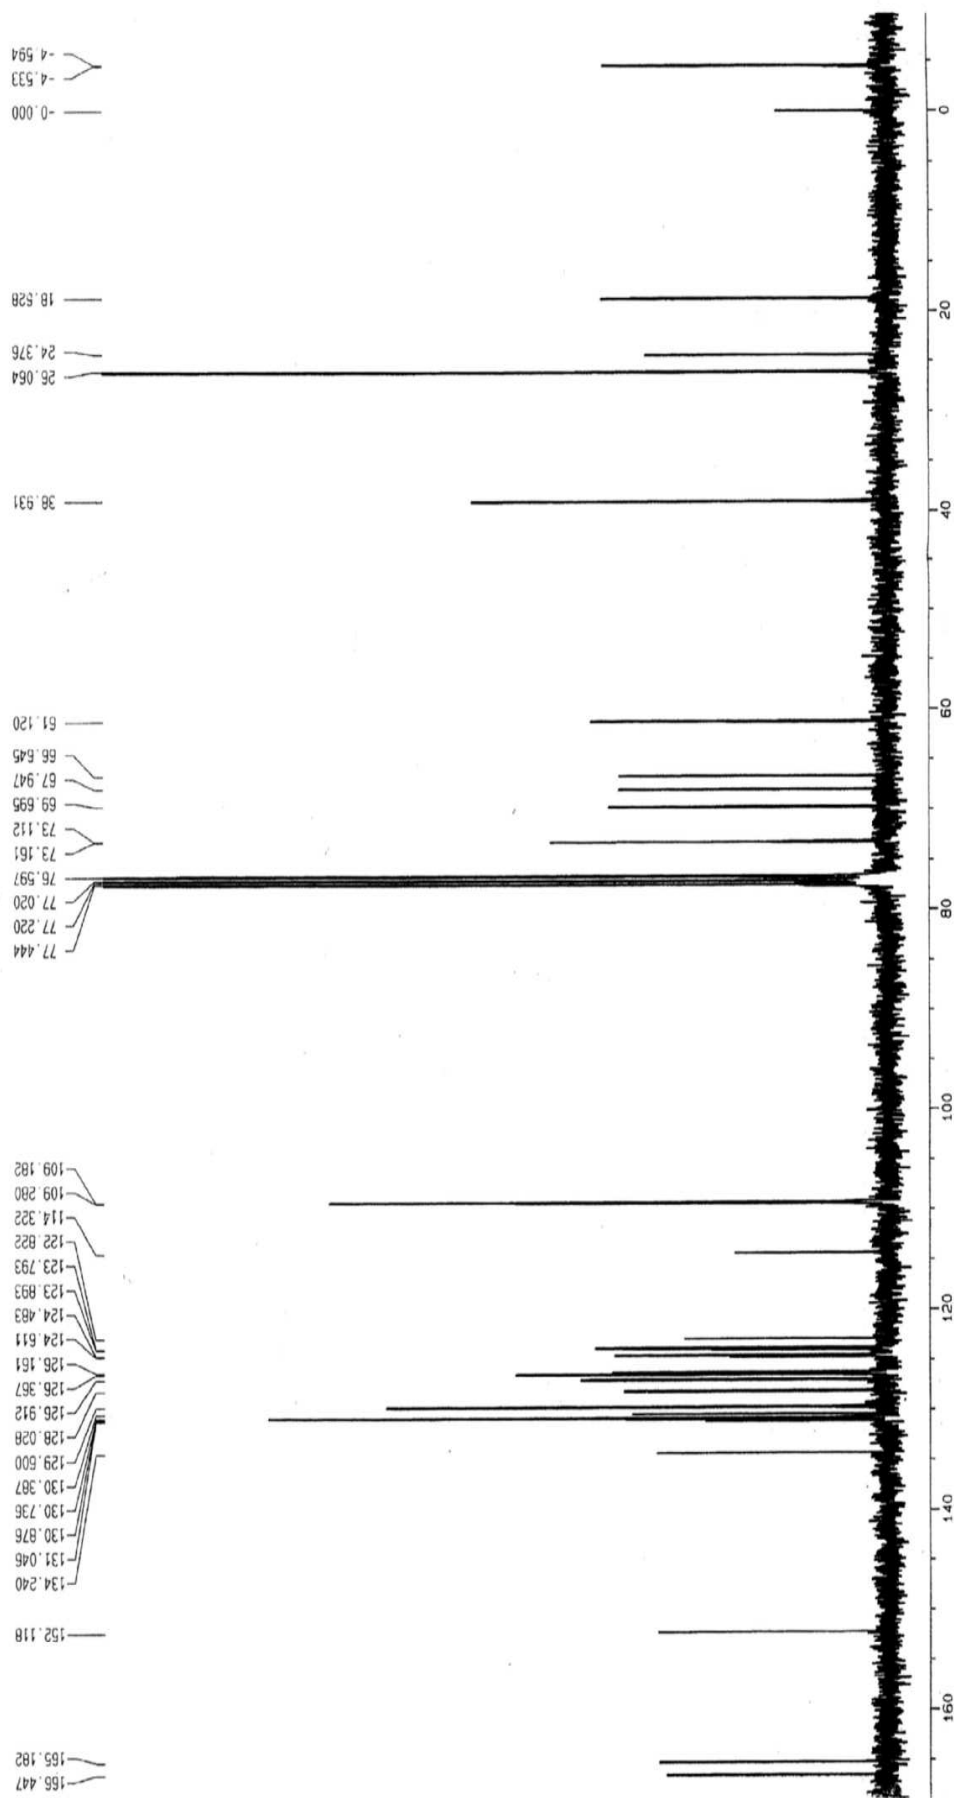

**Figure SI 13:**  $^{13}\text{C}$  NMR spectrum of 2-O-*tert*-butyl(dimethylsilyl)-4-O-[4-(dimethylamino)benzoyl]-6-O-pyrenoyl-*myo*-inositol-1,3,5-orthoacetate (10) in  $\text{CDCl}_3$

**Figure SI 14:**  $^1\text{H}$  NOESY spectrum of 2-*O-tert*-butyldimethylsilyl-4-*O*-[4-(dimethylamino)benzoyl]-6-*O*-pyrenoyl-*myo*-inositol-1,3,5-orthoacetate **10** in  $\text{CDCl}_3$ . The assignments of pyrenoyl (Pyr), inositol (Ins) and 4-(dimethylamino)benzoyl (DMAB) protons are shown by diagonal cross-peak labelling. Off-diagonal cross-peaks labelled by numbers show some NOE-interactions between closely located protons within the Pyr, Ins and DMAB moieties: **A:** DMAB (H-17) - DMAB (H-18); **B:**  $-\text{N}(\text{CH}_3)_2$  (H-19) - DMAB (H-18); **C:** Ins (H-1) - Ins (H-4); **D:** Ins (H-2) - Ins (H-6); **E:** Ins (H-5) - Ins (H-4); **F:** Ins (H-5) - Ins (H-6); **G:** Pyr (H-8) - Pyr (H-9); **H:** Pyr (H-16) - Pyr (H-15), **I:**  $-\text{NMe}_2$  (H-19) - DMAB (H-17); **J:**  $-\text{CH}_3$  (H-7) - Ins (H-4); **K:**  $-\text{CH}_3$  (H-7) - Ins (H-6); **L:**  $-\text{CH}_3$  (H-21) - Ins (H-1); **M:**  $-\text{CH}_3$  (H-21) - Ins (H-2). Cross-peaks labelled by numerals 1-9 indicate *inter*-partner interactions between pyrenoyl, inositol and DMAB moieties: DMAB (H-17) - Ins (H-2), cross-peak **1**; Pyr (H-8) - Ins (H-5), cross-peak **2**; Pyr (H-16) - Ins (H-2), cross-peak **3**; Pyr (H-8) - Ins (H-2), cross-peak **4**; Pyr (H-9) - H-15) -  $\text{NMe}_2$ (H-19), cross-peaks **5**; Pyr (H-16) - DMAB (H-17), cross-peak **6**; Pyr (H-15) - DMAB (H-18), cross-peak **7**; DMAB (H-17)- Ins  $-\text{CH}_3$ (H-21), cross-peak **8**; Pyr(16) - Ins  $-\text{CH}_3$ (H-21), cross-peak **9**.

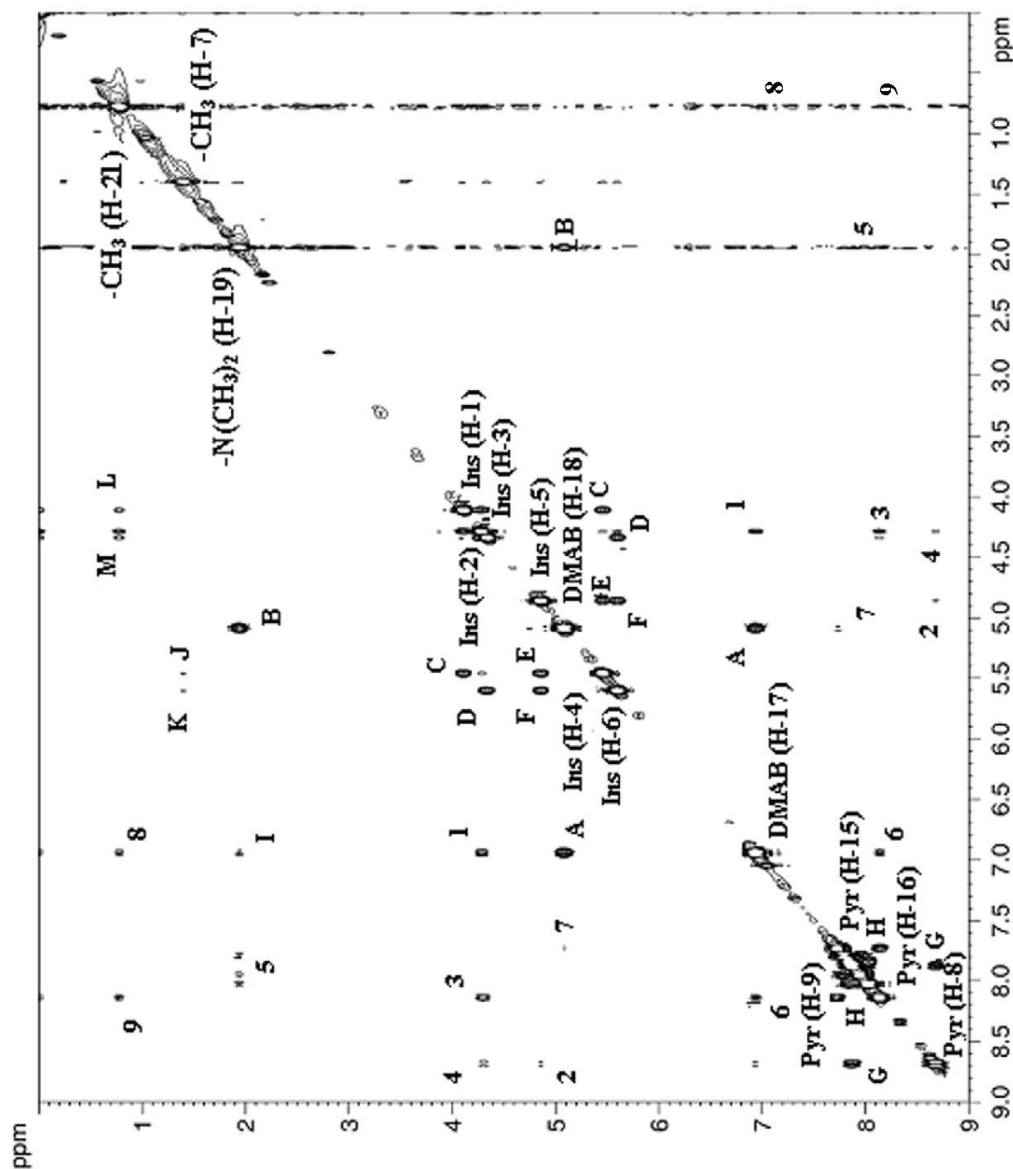

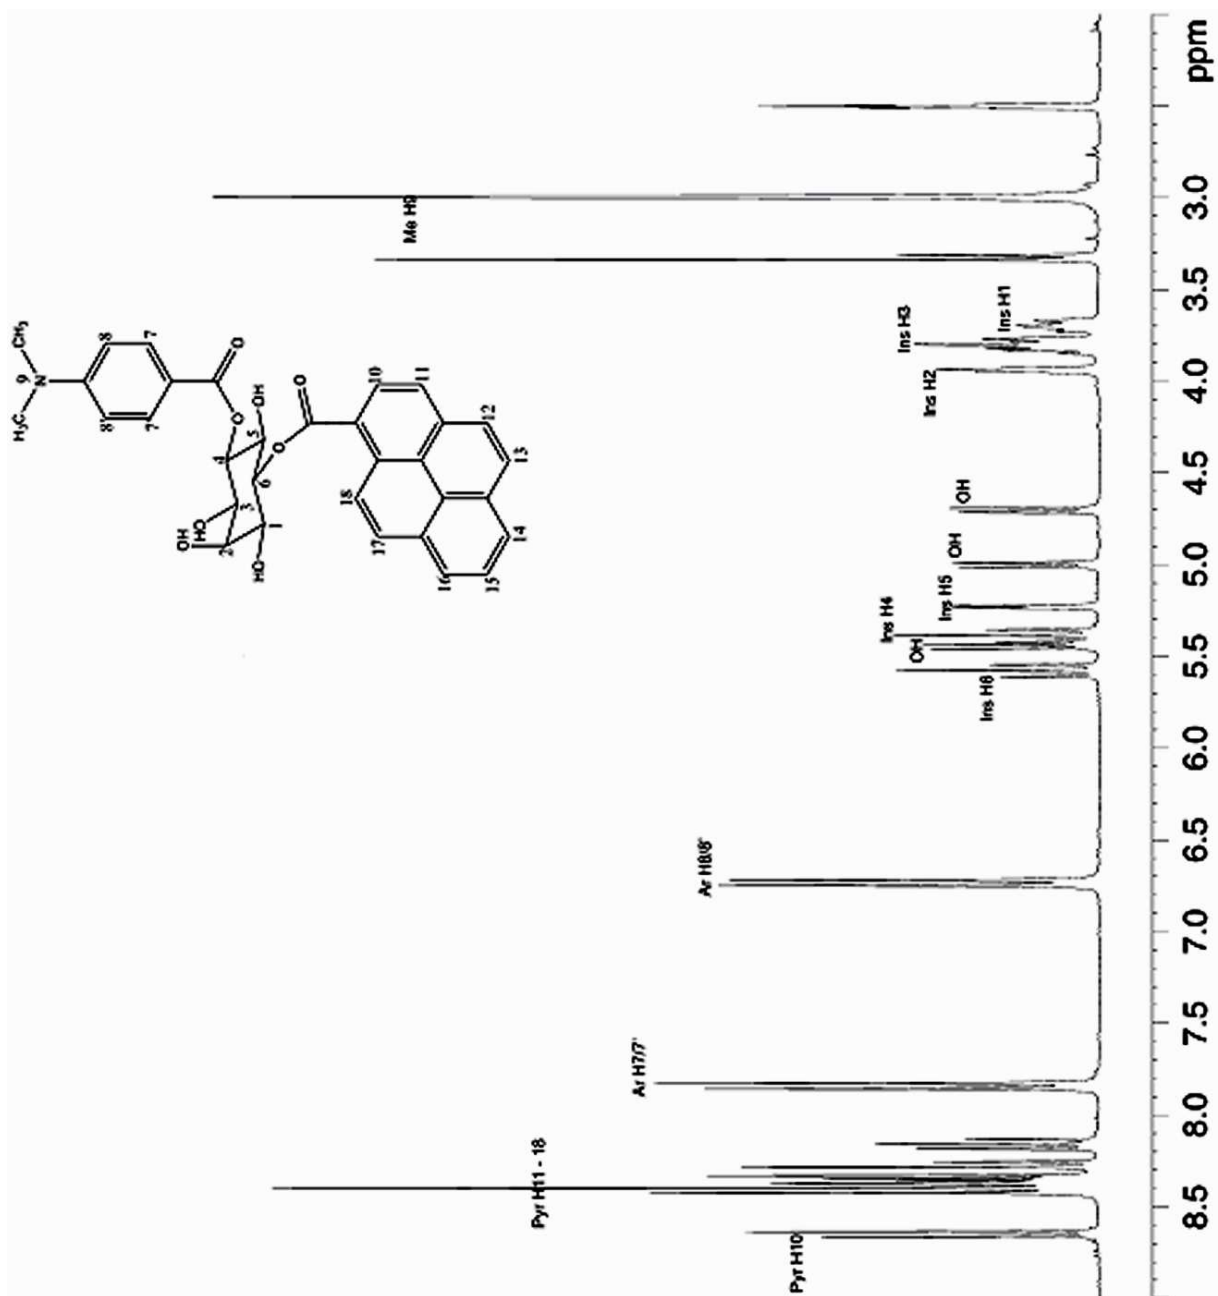

**Figure SI 15a:** <sup>1</sup>H NMR spectrum of 4-O-[4-(dimethylamino)benzoyl]-6-O-pyrenyl-myoinositol (**11**) in DMSO-d<sub>6</sub>

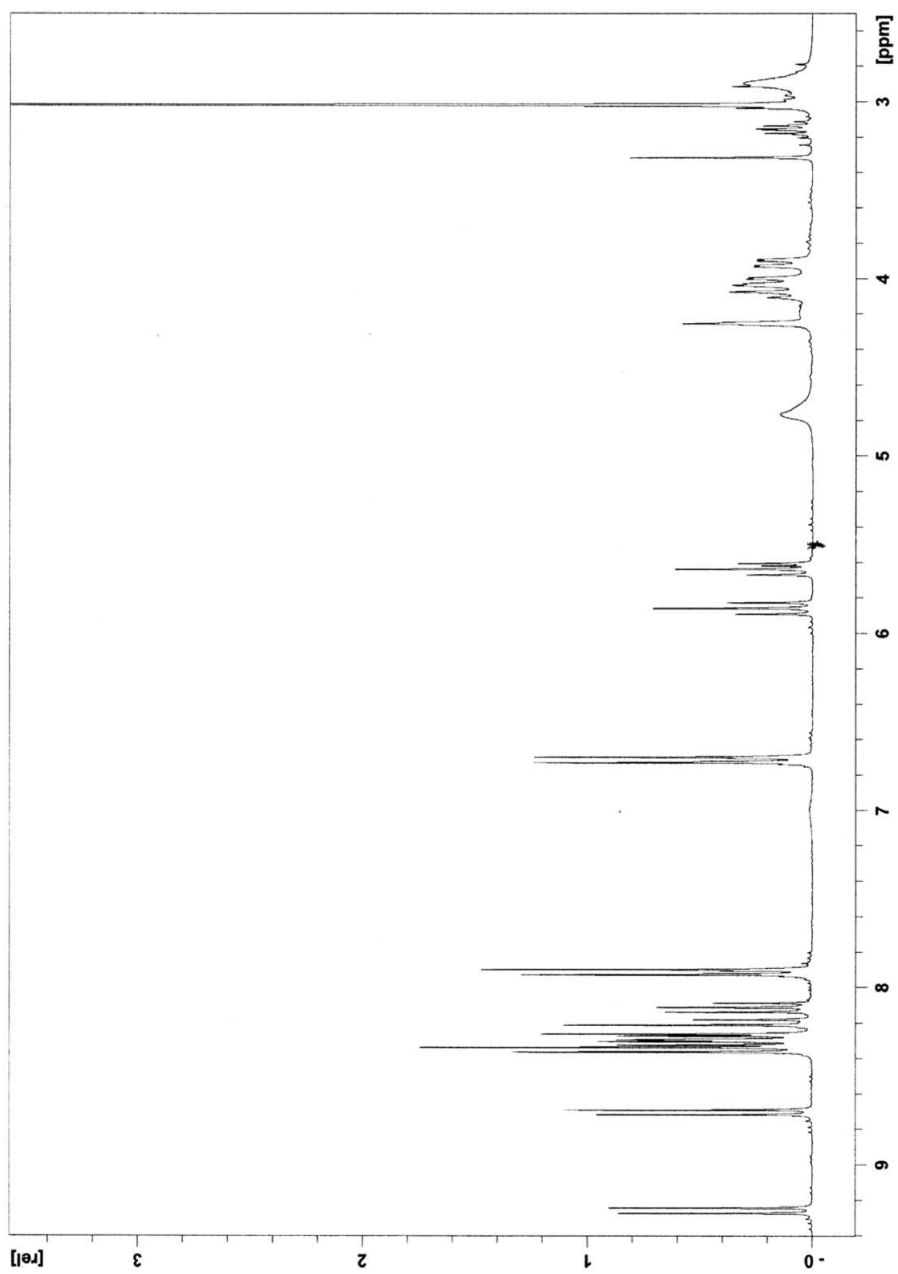

**Figure 15b:** <sup>1</sup>H NMR spectrum of 4-O-[4-(dimethylamino)benzoyl]-6-O-pyrenoyl-*myo*-inositol (**11**) in DMSO-d<sub>6</sub>/D<sub>2</sub>O



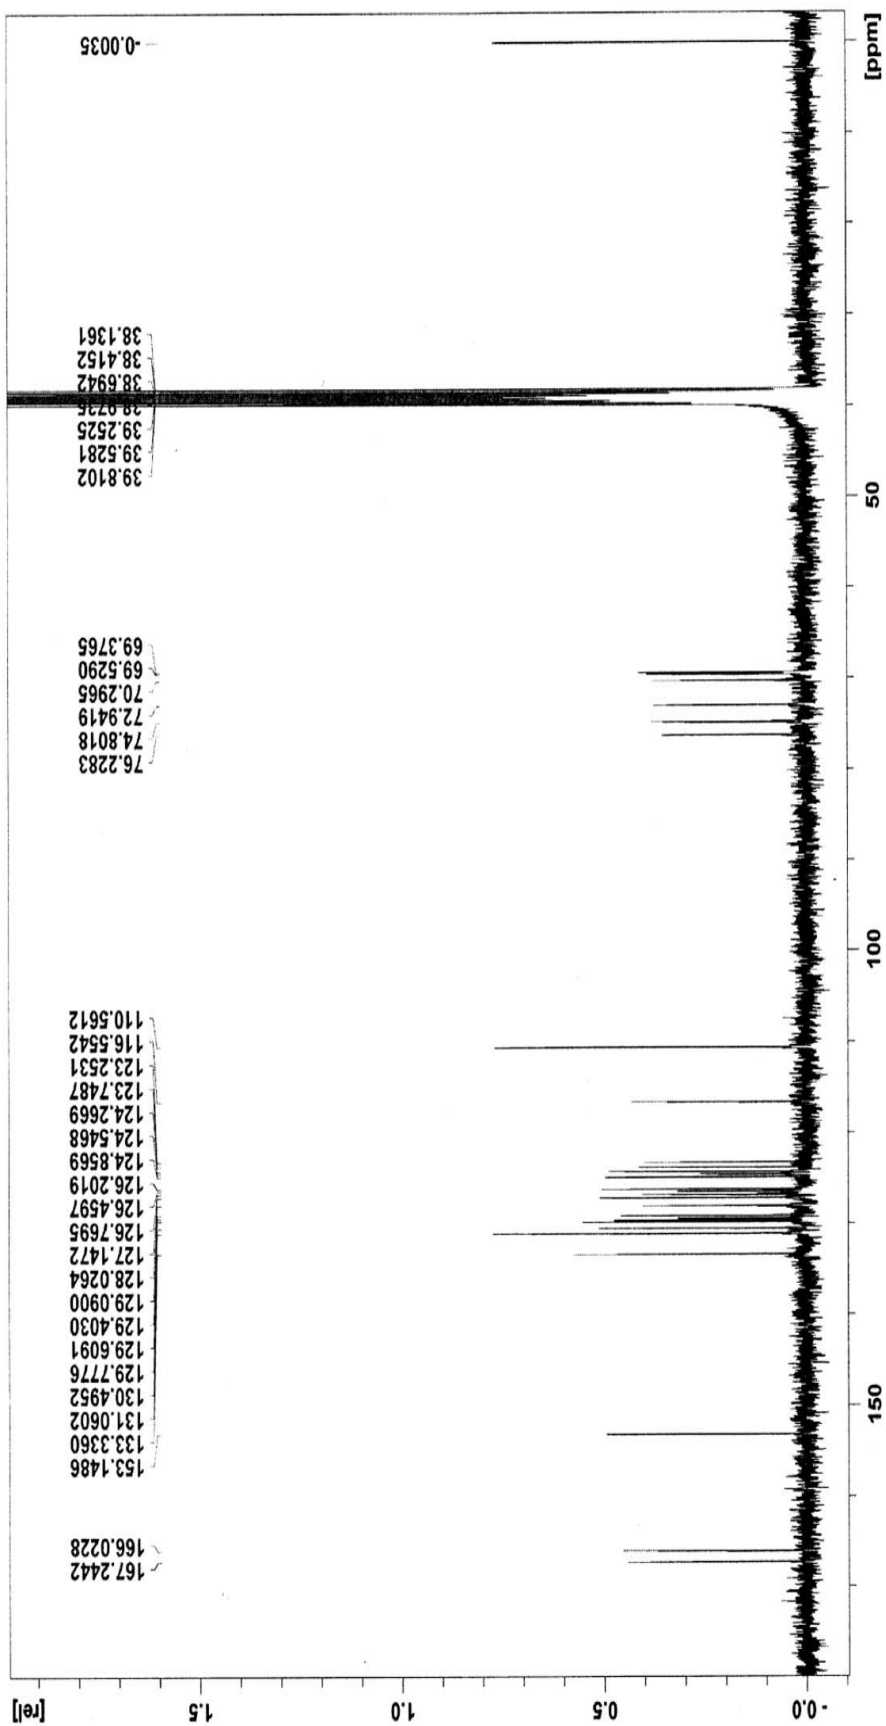

Figure SI 16:  $^{13}\text{C}$  NMR spectrum of 4-O-[4-(dimethylamino)benzoyl]-6-O-pyrenoyl-myo-inositol (**11**) in  $\text{DMSO-d}_6/\text{D}_2\text{O}$

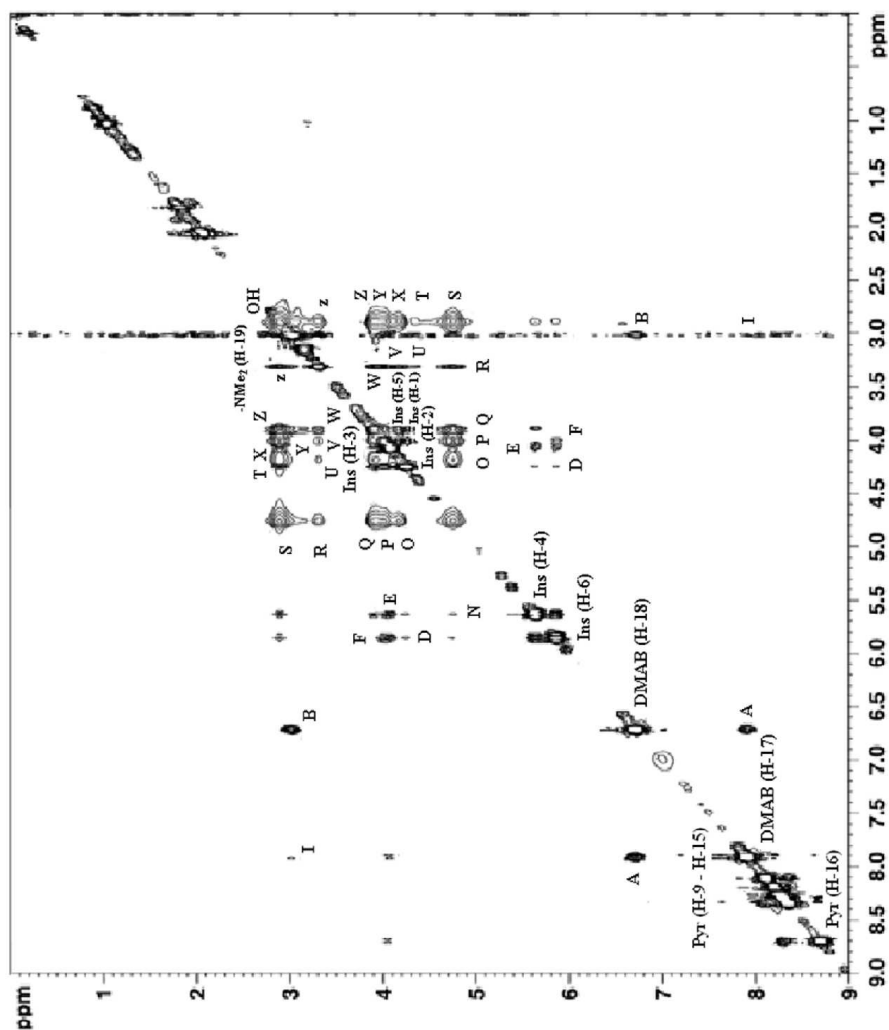

**Figure SI 17:**  $^1\text{H}$  NOESY spectrum of 4-O-[4-(dimethylamino)benzoyl]-6-O-pyrenoyl-*myo*-inositol **11**. The assignments of pyrenoyl (Pyr), inositol (Ins) and 4-(dimethylamino)benzoyl (DMAB) protons are shown by diagonal cross-peak labelling. Off-diagonal cross-peaks labelled by letters show some NOE-interactions between closely located protons within the Pyr, Ins and DMAB moieties: **A-I** crosspeaks show the same interactions among protons as labelled in Figure 2; **N:** OH – Ins (H-4); **O:** OH- Ins (H-2); **P:** OH – Ins (H-5); **Q:** OH – Ins (H-3); **R:** OH – OH; **S:** OH – OH; **T:** OH-OH, **U:** Ins (H-2) – OH; **V:** Ins (H-3) – OH; **W:** Ins (H-1) – OH; **X:** Ins (H-3)-OH; **Y:** Ins (H-5) – OH; **Z:** Ins (H-1) – OH; **z:** OH – OH.
